# Supplementary material for: V2O5/SiO2surface inspired, silsesquioxane-derived oxovanadium complexes and their properties
Source: Royal Society of Chemistry journal article supplement (doi:10.1039/b714933f), 2007-12-10

**Supporting Information:**

**Table S1.** Photo-assisted catalytic oxidation of benzene<sup>a</sup> and cyclohexane<sup>b</sup>.

| catalyst                                       | $\mu\text{mol}$ | phenol yield |                 | TON <sup>c</sup> |
|------------------------------------------------|-----------------|--------------|-----------------|------------------|
|                                                |                 | mmol/l       | $\mu\text{mol}$ |                  |
| none                                           | -               | 0.17         | 3               | -                |
| c-C <sub>5</sub> H <sub>9</sub> T <sub>7</sub> | 50.0            | 0.53         | 11              | 0.2              |
| <b>1</b>                                       | 50.4            | 0.79         | 16              | 0.3              |
| VO(acac) <sub>2</sub>                          | 49.6            | 3.96         | 79              | 1.6              |
| <b>2</b>                                       | 50.0            | 5.05         | 101             | 2.0              |
| c-C <sub>5</sub> H <sub>9</sub> I              | 56.6            | 7.26         | 145             | 2.6              |
| PPh <sub>4</sub> <b>3</b>                      | 49.9            | 8.58         | 171             | 3.4              |

  

| catalyst                                       | $\mu\text{mol}$   | cyclohexanone yield |                 | cyclohexanol yield |                 | total TON <sup>d</sup> |
|------------------------------------------------|-------------------|---------------------|-----------------|--------------------|-----------------|------------------------|
|                                                |                   | mmol/l              | $\mu\text{mol}$ | mmol/l             | $\mu\text{mol}$ |                        |
| none                                           | -                 | 0.77                | 15              | 1.21               | 24              | -                      |
| c-C <sub>5</sub> H <sub>9</sub> T <sub>7</sub> | 25.0              | 0.15                | 3               | 0.40               | 8               | 0.44                   |
| <b>1</b>                                       | 25.6              | 1.31                | 26              | 0.96               | 19              | 1.78                   |
| VO(acac) <sub>2</sub>                          | 25.8              | 3.07                | 61              | 2.28               | 46              | 4.14                   |
| <b>2</b>                                       | 23.7              | 0.89                | 18              | 4.99               | 100             | 4.97                   |
| c-C <sub>5</sub> H <sub>9</sub> I              | 27.3              | 18.80               | 376             | 18.15              | 363             | 27.06                  |
| PPh <sub>4</sub> <b>3</b>                      | 25.0 <sup>e</sup> | 4.34                | 93              | 5.41               | 116             | 8.36                   |

<sup>a</sup> Catalyst 50  $\mu\text{mol}$ , benzene 10  $\text{cm}^3$ , acetonitrile 10  $\text{cm}^3$ , O<sub>2</sub> 1.6 atm, 298 K, 6 h, 200 W Hg-medium-pressure arc lamp.

<sup>b</sup> Catalyst 25  $\mu\text{mol}$ , cyclohexane 20  $\text{cm}^3$ , O<sub>2</sub> 1.6 atm, 298 K, 6 h, 200 W Hg-medium-pressure arc lamp.

<sup>c</sup> Turnover number (moles- phenol / moles-catalyst used).

<sup>d</sup> Turnover number (moles-cyclohexanone and cyclohexanol / moles-catalyst used).

<sup>e</sup> This amount was added but not dissolved, so that the entry only provided the lower limit for **3**.

**Figure S2:** IR spectra for  $\text{NBu}_4\text{VO}_3$  (before and after  $^{18}\text{O}$ -enrichment).

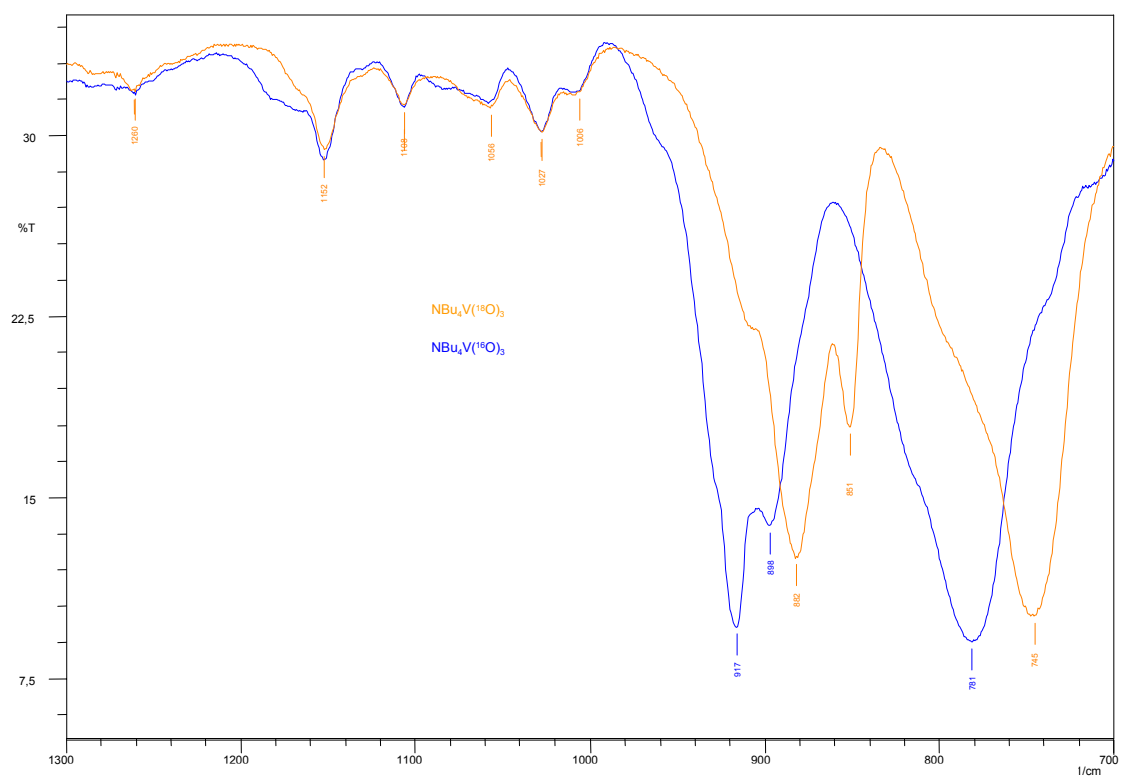

**Figure S3:** Raman spectra for complex  $3^{NBu_4}$  (before and after  $^{18}O$ -enrichment).

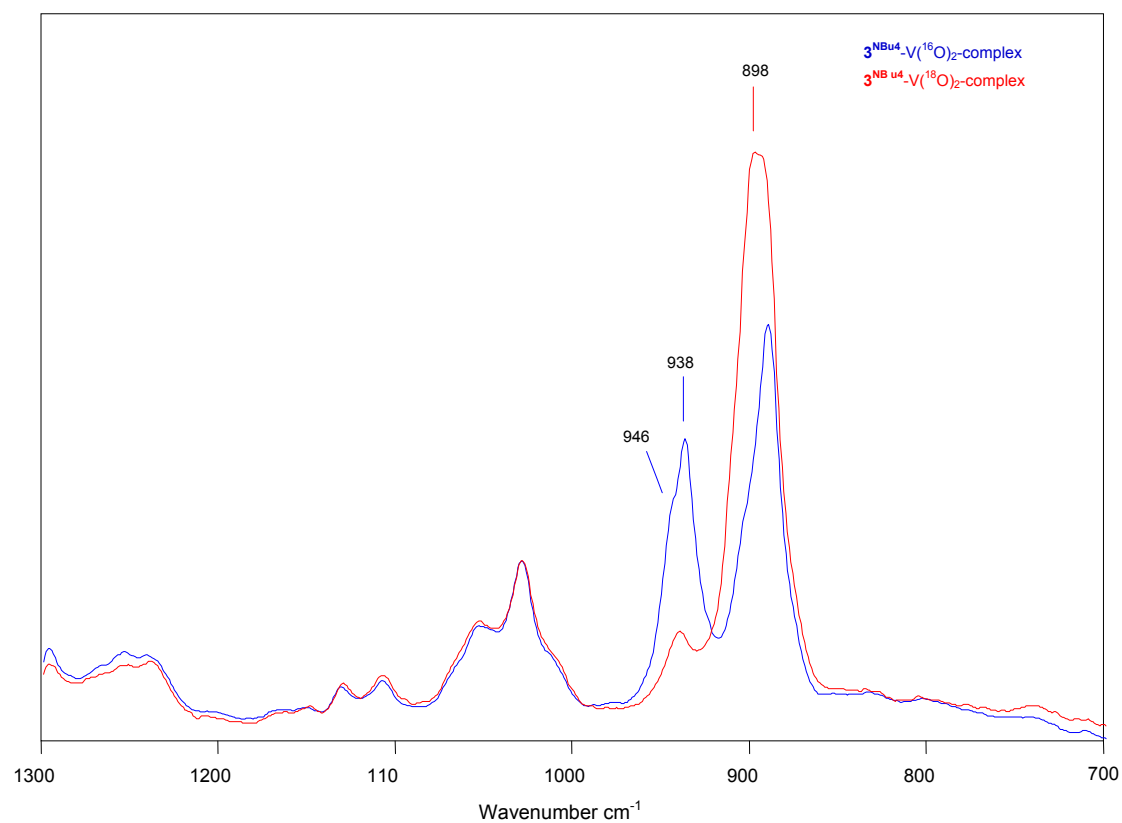

**Figure S4:** Raman spectra for complex  $4^{NBu_4}$  (before and after  $^{18}O$ -enrichment).

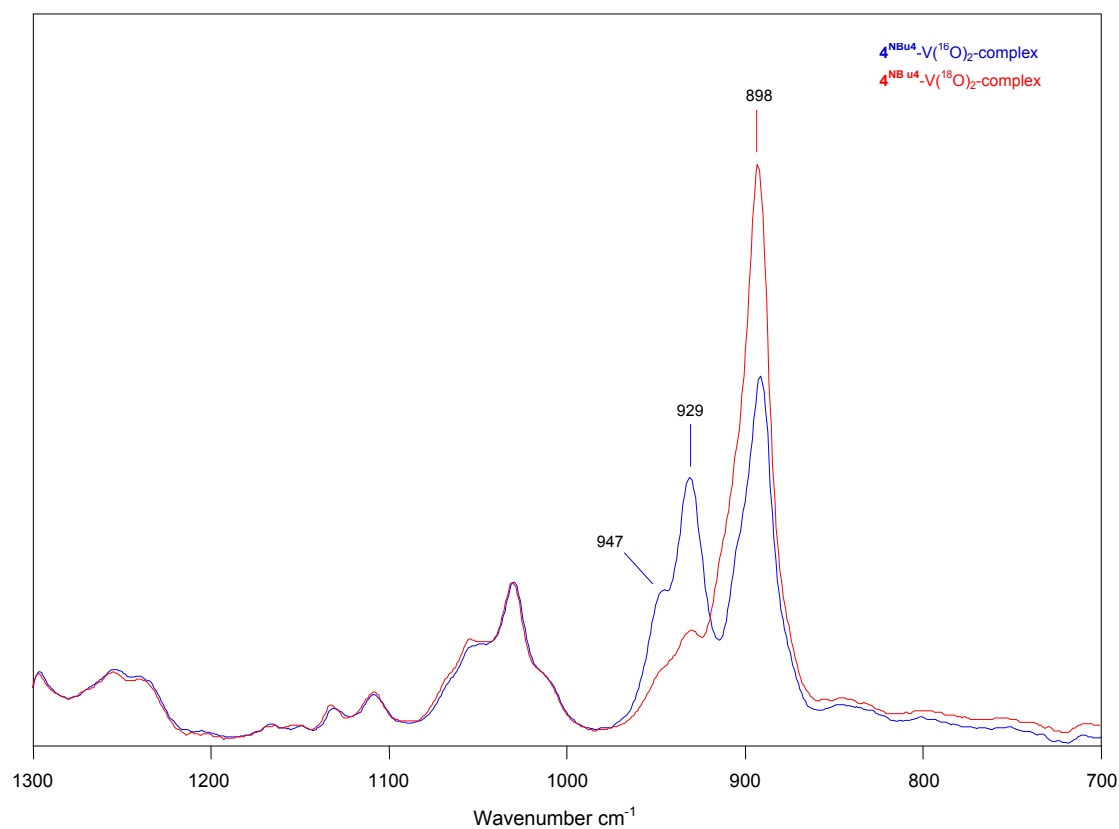

**Figure S5:** Raman spectra for  $c\text{-C}_5\text{H}_9\text{T}_7$  and complex  $3^{\text{NBu}_4}$ .

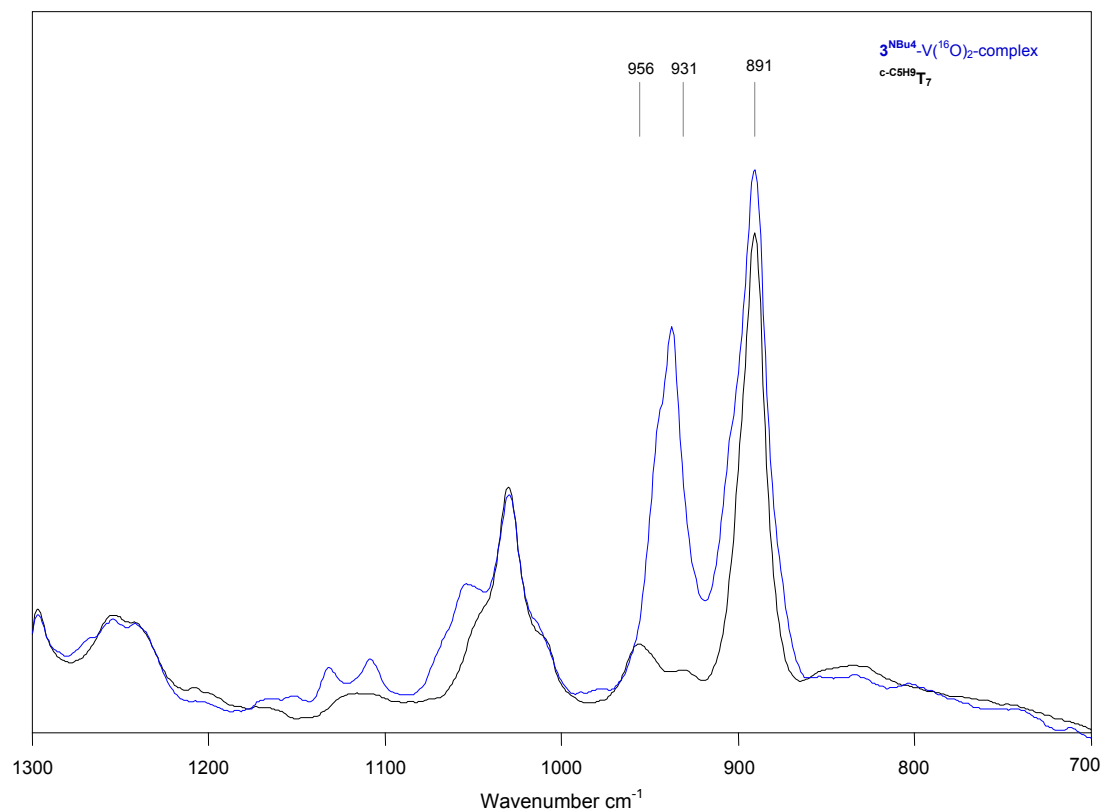

**Figure S5:** Raman spectra for  $\text{TMS-}c\text{-C}_5\text{H}_9\text{T}_7$  and complex  $4^{\text{NBu}_4}$ .

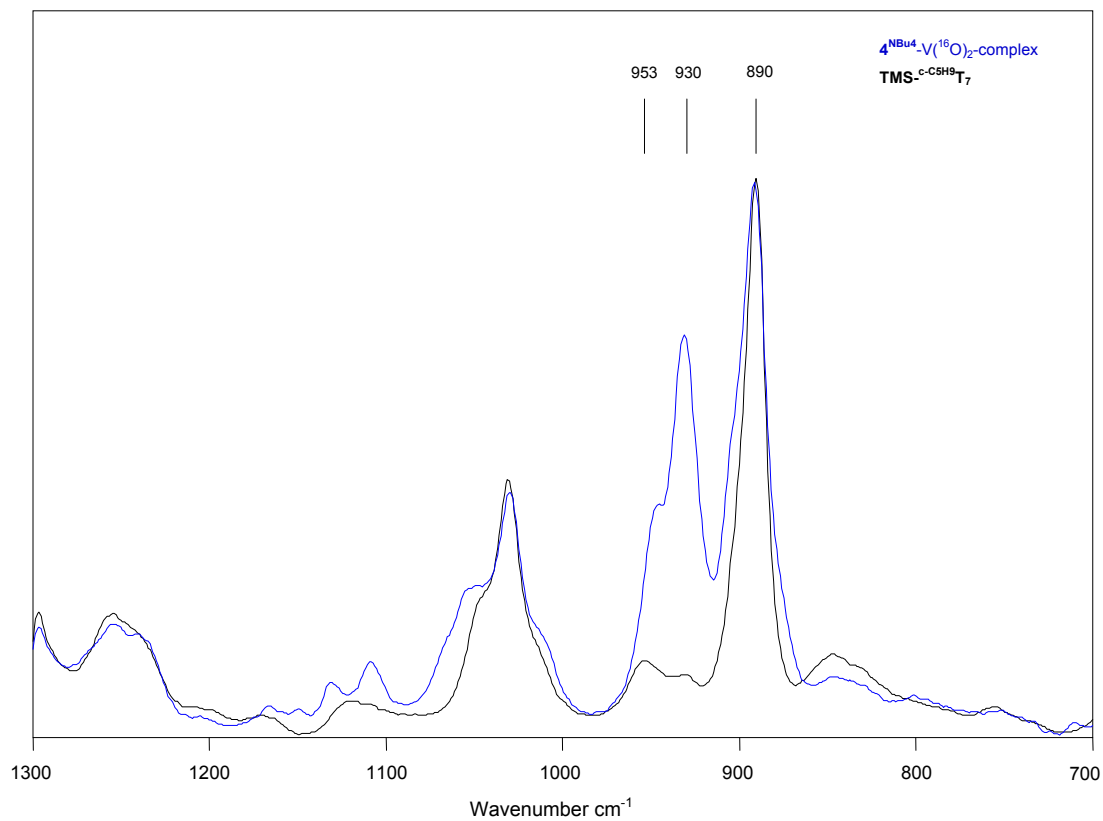

Supplement: b714933f.pdf [file b714933f.pdf]
